# Supplementary material for: Investigation on heterogeneous Rh catalysts for the hydroformylation of 1,3-butadiene to adipic aldehyde
Source: Royal Society of Chemistry journal article supplement (doi:10.1039/d4cy00745j), 2024-11-07
Supplement: d4cy00745j1.pdf [file d4cy00745j1.pdf]

**Electronic Supplementary Information for**  
**Investigation on heterogeneous Rh Catalysts for the**  
**Hydroformylation of 1,3-Butadiene to adipic aldehyde**

Lijin Gan, Zekun Liu, Lei Feng, Yi Duan, Guangyuan Xu, Si Chen, Huan Yan\*

*Key Laboratory of Precision and Intelligent Chemistry, School of Chemistry and  
Materials Science, University of Science and Technology of China, Hefei, Anhui,  
230026, P. R. China.*

**Corresponding Author:**  
*yanhuan1@ustc.edu.cn.*

**Table of Contents**

1. A representative GC-MS chromatogram
2. Supplementary electron micrographs
3. Solid-state  $^{31}\text{P}$  MAS NMR spectra
4. Hydroformylation activity testing of 1,3-butadiene

# 1. A representative GC-MS chromatogram

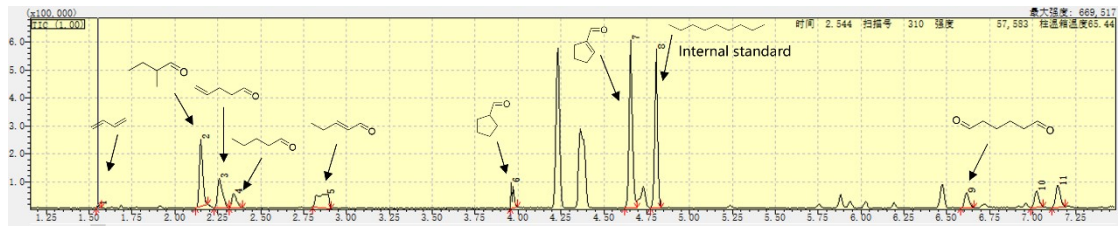

**Fig. S1** Gas chromatogram of the reaction.

## 2. Supplementary electron micrographs

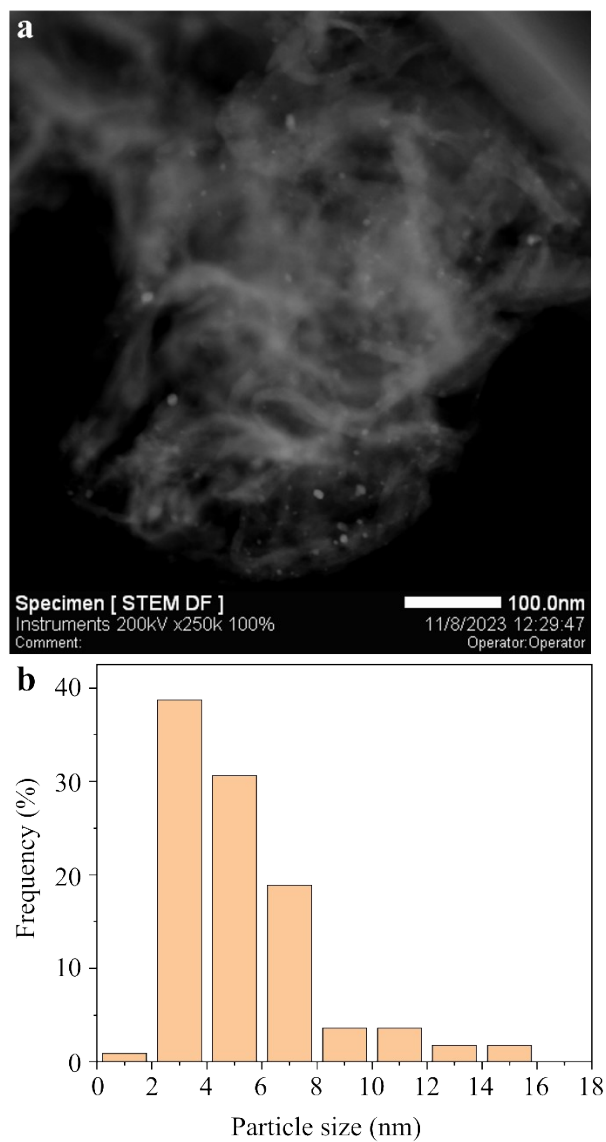

**Fig. S2** (a) HAADF-STEM image and (b) particle size frequency distribution diagram of Rh/g-C<sub>3</sub>N<sub>4</sub> (6.41 wt%).

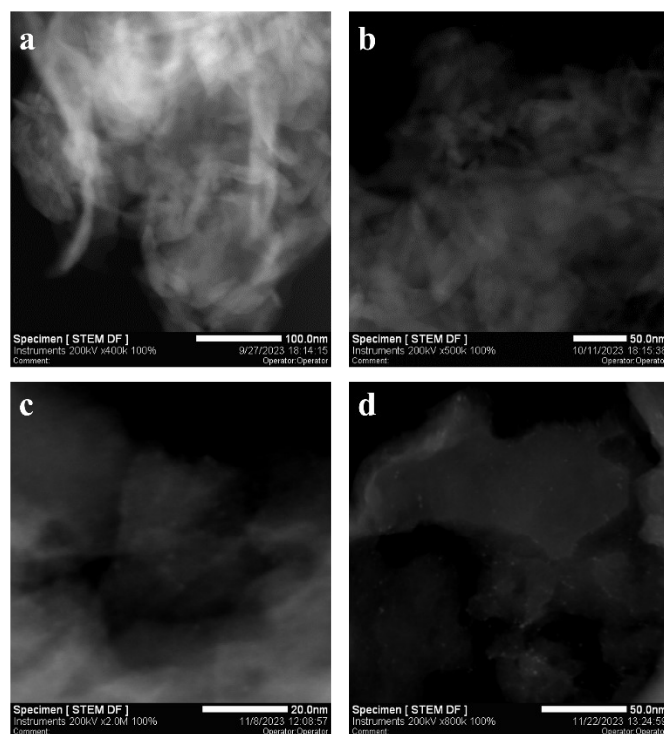

**Fig. S3** HAADF-STEM images of (a) L11-Rh/g-C<sub>3</sub>N<sub>4</sub> (1.0wt%) before reaction, (b) L11-Rh/g-C<sub>3</sub>N<sub>4</sub> (1.0wt%) after the second recycle, (c) Rh/g-C<sub>3</sub>N<sub>4</sub> (1.7wt%) and (d) Rh/g-C<sub>3</sub>N<sub>4</sub> (3.49wt%).

### 3. Solid-state $^{31}\text{P}$ MAS NMR spectra

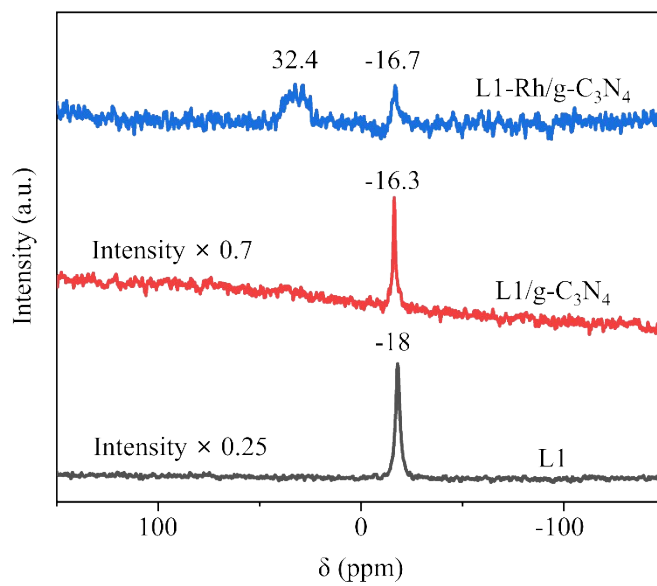

**Fig. S4** Solid-state  $^{31}\text{P}$  MAS NMR spectra of L1-Rh/g-C<sub>3</sub>N<sub>4</sub>, L1/g-C<sub>3</sub>N<sub>4</sub> (obtained by impregnating g-C<sub>3</sub>N<sub>4</sub> with L1 under standard Schlenk conditions) and L1.

## 4. Hydroformylation activity testing of 1,3-butadiene

**Table S1** Effect of reaction temperature on the hydroformylation of 1,3-Butadiene by L11-Rh/g-C<sub>3</sub>N<sub>4</sub>.<sup>a</sup>

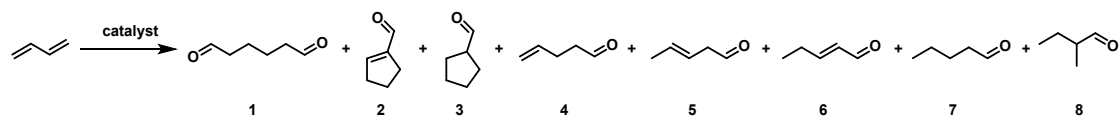

| Entry | T/°C | Conv. (%) | Sel. <sup>b</sup> (%) |     |      |     |      |   |      |      | Carbon balance % |
|-------|------|-----------|-----------------------|-----|------|-----|------|---|------|------|------------------|
|       |      |           | 1                     | 2   | 3    | 4   | 5    | 6 | 7    | 8    |                  |
| 1     | 110  | 100       | 1.5                   | 0.4 | 15.4 | 6.2 | 5.7  | 0 | 53   | 17.8 | 95.1             |
| 2     | 100  | 99.7      | 8.5                   | 0.6 | 10.8 | 0.5 | 10.3 | 0 | 66.1 | 3.2  | 92.3             |
| 3     | 90   | 98.1      | 13.7                  | 0.1 | 3    | 0.5 | 8.4  | 0 | 56.8 | 17.5 | 98.7             |
| 4     | 80   | 95.9      | 11.8                  | 0.7 | 0.3  | 3.9 | 56.1 | 0 | 27.2 | 0    | 93.9             |

<sup>a</sup> Reaction conditions: 1 g 1,3-Butadiene solution (6.21 wt% in toluene), 4 g toluene, 1 mol% L11-Rh/g-C<sub>3</sub>N<sub>4</sub>, 4 MPa CO/H<sub>2</sub> (1:1), 10 h.

<sup>b</sup> Selectivity of aldehyde products in the liquid phase.

**Table S2** Effect of the initial CO/H<sub>2</sub> (1:1) pressure on the hydroformylation of 1,3-Butadiene by L11-Rh/g-C<sub>3</sub>N<sub>4</sub>.<sup>a</sup>

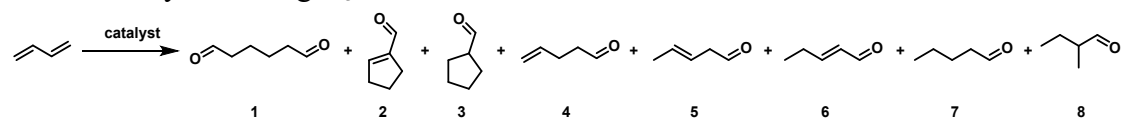

| Entry | p/MPa | Conv. (%) | Sel. <sup>b</sup> (%) |     |     |      |      |   |      |      | Carbon balance % |
|-------|-------|-----------|-----------------------|-----|-----|------|------|---|------|------|------------------|
|       |       |           | 1                     | 2   | 3   | 4    | 5    | 6 | 7    | 8    |                  |
| 1     | 1     | 97.7      | 5.4                   | 1.2 | 5.3 | 10.6 | 10.2 | 0 | 62.4 | 4.9  | 96.7             |
| 2     | 2     | 97.4      | 7                     | 2.1 | 6.1 | 0    | 16.6 | 0 | 68.1 | 0.1  | 97.5             |
| 3     | 3     | 98.6      | 12.9                  | 0.7 | 5.1 | 0    | 21.2 | 0 | 58.9 | 1.2  | 99.3             |
| 4     | 4     | 98.1      | 13.7                  | 0.1 | 3   | 0.5  | 8.4  | 0 | 56.8 | 17.5 | 98.7             |
| 5     | 5     | 99.4      | 7.1                   | 0   | 3.5 | 0    | 0    | 0 | 60.7 | 28.7 | 92.1             |

<sup>a</sup> Reaction conditions: 1 g 1,3-Butadiene solution (6.21 wt% in toluene), 4 g toluene, 1 mol% L11-Rh/g-C<sub>3</sub>N<sub>4</sub>, 90 °C, 10 h.

<sup>b</sup> Selectivity of aldehyde products in the liquid phase.

**Table S3** Hydroformylation of 1,3-Butadiene with different ligands. <sup>a</sup>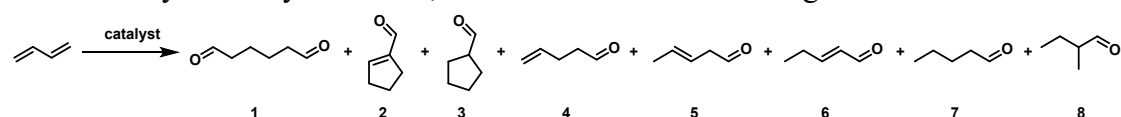

| Entry           | Catalyst                                                | Conv.<br>(%) | Sel. <sup>b</sup> (%) |     |      |     |      |      |      |      | Carbon<br>balance % |
|-----------------|---------------------------------------------------------|--------------|-----------------------|-----|------|-----|------|------|------|------|---------------------|
|                 |                                                         |              | 1                     | 2   | 3    | 4   | 5    | 6    | 7    | 8    |                     |
| 1               | L1-Rh/g-<br>C <sub>3</sub> N <sub>4</sub> (1.0<br>wt%)  | 89.6         | 4.8                   | 0.1 | 3.4  | 5.6 | 22.1 | 14.5 | 49.1 | 0.4  | 91.2                |
| 2               | L2-Rh/g-<br>C <sub>3</sub> N <sub>4</sub> (1.0<br>wt%)  | 65.6         | 0                     | 0   | 0    | 4.5 | 10.3 | 81.8 | 0    | 3.4  | 82.3                |
| 3               | L3-Rh/g-<br>C <sub>3</sub> N <sub>4</sub> (1.0<br>wt%)  | 85.8         | 4                     | 0.8 | 0    | 7.1 | 39   | 22.2 | 25.2 | 1.7  | 92.6                |
| 4               | L4-Rh/g-<br>C <sub>3</sub> N <sub>4</sub> (1.0<br>wt%)  | 68.3         | 0                     | 0   | 7.5  | 2.2 | 3    | 77.6 | 2.2  | 7.5  | 81.5                |
| 5               | L5-Rh/g-<br>C <sub>3</sub> N <sub>4</sub> (1.0<br>wt%)  | 75.2         | 0.6                   | 0.3 | 2.9  | 5.8 | 32.1 | 24.6 | 28.3 | 5.4  | 81.6                |
| 6               | L6-Rh/g-<br>C <sub>3</sub> N <sub>4</sub> (1.0<br>wt%)  | 97.8         | 0                     | 0   | 22.7 | 0.9 | 7    | 5.1  | 58.7 | 5.6  | 93.4                |
| 7               | L7-Rh/g-<br>C <sub>3</sub> N <sub>4</sub> (1.0<br>wt%)  | 67.1         | 0                     | 0   | 0    | 2.7 | 11.2 | 74.5 | 5.8  | 5.8  | 83.8                |
| 8               | L8-Rh/g-<br>C <sub>3</sub> N <sub>4</sub> (1.0<br>wt%)  | 73.1         | 0                     | 0   | 0    | 2.4 | 8.1  | 78.3 | 5.5  | 5.7  | 85.1                |
| 9               | L9-Rh/g-<br>C <sub>3</sub> N <sub>4</sub> (1.0<br>wt%)  | 70           | 0                     | 0   | 0    | 7.6 | 26.9 | 39.2 | 12.9 | 13.4 | 86.3                |
| 10              | L10-Rh/g-<br>C <sub>3</sub> N <sub>4</sub> (1.0<br>wt%) | 77.2         | 0                     | 0   | 0    | 4.7 | 10.8 | 67.4 | 7.8  | 9.3  | 80.9                |
| 11              | L11-Rh/g-<br>C <sub>3</sub> N <sub>4</sub> (1.0<br>wt%) | 98.1         | 13.7                  | 0.1 | 3    | 0.5 | 8.4  | 0    | 56.8 | 17.5 | 98.7                |
| 12 <sup>c</sup> | L11-Rh/g-<br>C <sub>3</sub> N <sub>4</sub> (1.0<br>wt%) | 87.3         | 9.9                   | 2   | 1.1  | 4.4 | 16.4 | 35.5 | 30.5 | 0.2  | 96.3                |



|                 |                                                          |      |      |     |     |     |      |      |      |      |      |
|-----------------|----------------------------------------------------------|------|------|-----|-----|-----|------|------|------|------|------|
| 13 <sup>d</sup> | L11-Rh/g-<br>C <sub>3</sub> N <sub>4</sub> (1.0<br>wt%)  | 75.9 | 1.8  | 1.2 | 0   | 6.1 | 18.5 | 60.6 | 11.4 | 0.4  | 91.2 |
| 14              | L11-Rh/g-<br>C <sub>3</sub> N <sub>4</sub> (0.23<br>wt%) | 93.6 | 2    | 6.2 | 7   | 0.9 | 19.7 | 0    | 64.1 | 0.1  | 91.7 |
| 15              | L11-Rh/g-<br>C <sub>3</sub> N <sub>4</sub> (1.7<br>wt%)  | 98.5 | 10.1 | 0.2 | 1.7 | 5.2 | 0    | 13.9 | 47.9 | 21   | 92.3 |
| 16              | L11-Rh/g-<br>C <sub>3</sub> N <sub>4</sub> (3.49<br>wt%) | 98.9 | 8.5  | 0.4 | 1.9 | 7.4 | 6.5  | 0    | 47.2 | 28.1 | 91.4 |
| 17              | L12-Rh/g-<br>C <sub>3</sub> N <sub>4</sub> (1.0<br>wt%)  | 77.2 | 0    | 0.3 | 3.3 | 2.6 | 12.9 | 67.7 | 7.3  | 5.9  | 85.0 |
| 18              | L13-Rh/g-<br>C <sub>3</sub> N <sub>4</sub> (1.0<br>wt%)  | 94.8 | 2.3  | 0.2 | 5   | 2.2 | 26.6 | 0    | 56   | 7.7  | 86.8 |
| 19              | L14-Rh/g-<br>C <sub>3</sub> N <sub>4</sub> (1.0<br>wt%)  | 74.4 | 0    | 0   | 0   | 2.5 | 1.9  | 82.5 | 5.6  | 7.5  | 81.8 |
| 20              | L15-Rh/g-<br>C <sub>3</sub> N <sub>4</sub> (1.0<br>wt%)  | 89   | 1.4  | 0.3 | 2.7 | 6.8 | 45   | 0    | 43.6 | 0.2  | 92.1 |
| 21              | L16-Rh/g-<br>C <sub>3</sub> N <sub>4</sub> (1.0<br>wt%)  | 98.6 | 2    | 0   | 4.3 | 5   | 5.3  | 9.8  | 43.9 | 29.7 | 92.3 |
| 22              | L17-Rh/g-<br>C <sub>3</sub> N <sub>4</sub> (1.0<br>wt%)  | 83.1 | 0.6  | 0.3 | 3.1 | 2.9 | 26.2 | 30.6 | 30.6 | 5.7  | 89.7 |
| 23              | L18-Rh/g-<br>C <sub>3</sub> N <sub>4</sub> (1.0<br>wt%)  | 97.9 | 0    | 0   | 1.9 | 4   | 4.3  | 27.1 | 29.5 | 33.2 | 89.9 |
| 24              | L19-Rh/g-<br>C <sub>3</sub> N <sub>4</sub> (1.0<br>wt%)  | 93.8 | 4.2  | 0.5 | 4.4 | 2.8 | 46.8 | 6.2  | 28.2 | 6.9  | 91.5 |
| 25              | L20-Rh/g-<br>C <sub>3</sub> N <sub>4</sub> (1.0<br>wt%)  | 100  | 8.3  | 0.4 | 5.4 | 6.6 | 0    | 3.1  | 59.3 | 16.9 | 97.3 |

<sup>a</sup> Reaction conditions: 1 g 1,3-Butadiene solution (7.81 wt% in toluene), 4 g toluene, 1 mol% Rh catalyst, 4 MPa CO/H<sub>2</sub> (1:1), 90 °C, 10 h.

<sup>b</sup> Selectivity of aldehyde products in the liquid phase.

<sup>c</sup> The first recycle of the catalyst L11-Rh/g-C<sub>3</sub>N<sub>4</sub> (1.0wt%).

<sup>d</sup> The second recycle of the catalyst L11-Rh/g-C<sub>3</sub>N<sub>4</sub> (1.0wt%).
